# Supplementary material
Source: MDPI journal article supplement (https://www.mdpi.com/2073-4395/13/7/1852)
Supplement: s1 [file s1]

Archive with 2 entries (2 files):
- Supplement Table S1. Declared content of Naturamin WSP (DAYMSA).pdf
- Supplement Table S2. Mean temperature and monthly rainfall during in the experimental area in the growing.pdf
