# Supplementary material
Source: MDPI journal article supplement (https://www.mdpi.com/2073-4395/13/7/1852)
Supplement: s1 [file s1 › Supplement Table S1. Declared content of Naturamin WSP (DAYMSA).pdf]

**Table S1.:** Declared content of Naturamin WSP (DAYMSA)

| <b>Chemicals</b>             | <b>Content</b>   |
|------------------------------|------------------|
| <b>Free amino acids:</b>     | <b>80% p/p</b>   |
| Ser:                         | 14,5%            |
| Pro:                         | 12,2%            |
| Glu:                         | 11,8%            |
| Gly:                         | 8,2%             |
| Asp:                         | 7,8%             |
| Leu:                         | 7,2%             |
| Arg:                         | 6,2%             |
| Val:                         | 5,9%             |
| Phe:                         | 5,8%             |
| Thr:                         | 5,8%             |
| Ala:                         | 5,8%             |
| Ile:                         | 3,7%             |
| His; Lys; Cys; Tyr; Met:     | < 2%             |
| <b>Total Nitrogen (N):</b>   | <b>12,8% p/p</b> |
| <b>Organic Nitrogen (N):</b> | <b>12,8% p/p</b> |

**Source:** Desarrollo Agrícola y Minero S.A. (DAYMSA), Camino de En medio 120,  
50013 Zaragoza - Zaragoza - Spain
