# Supplementary material
Source: MDPI journal article supplement (https://www.mdpi.com/2073-4395/13/7/1852)
Supplement: s1 [file s1 › Supplement Table S2. Mean temperature and monthly rainfall during in the experimental area in the growing.pdf]

**Table S2.** Mean temperature and monthly rainfall during in the experimental area in the growing season of 2021 and 2022.

| Month          | Mean temp. in 2021<br>°C | Mean temp. in 2022<br>°C | Total rainfall in 2021<br>mm | Total rainfall in 2022<br>mm |
|----------------|--------------------------|--------------------------|------------------------------|------------------------------|
| March          | 3.3                      | 4.3                      | 29.7                         | 1.7                          |
| April          | 5.8                      | 7.8                      | 37.5                         | 57.1                         |
| May            | 11.6                     | 13.6                     | 67.6                         | 55.1                         |
| June           | 19.1                     | 18.8                     | 24.2                         | 46.2                         |
| July           | 20.6                     | 18.5                     | 44.2                         | 25.8                         |
| Growing period | 12.8                     | 12.6                     | 203.2                        | 185.9                        |

Source: <https://danepubliczne.imgw.pl/>
